# Supplementary material for: Protein disulphide isomerase (PDI) is protective against amyotrophic lateral sclerosis (ALS)-related mutant Fused in Sarcoma (FUS) in in vitro models
Source: PubMed Central journal article supplement (PMC8413276; doi:10.1038/s41598-021-96181-2), 2021-09-02

## Supplementary figure

Protein disulphide isomerase (PDI) is protective against amyotrophic lateral sclerosis (ALS)-related mutant Fused in Sarcoma (FUS) in in vitro models.

S Parakh<sup>1,3</sup>, E R. Perri<sup>1,3</sup>, M Vidal<sup>1</sup>, J Sultana<sup>1,3</sup>, S Shadfar<sup>1</sup>, P Mehta<sup>1</sup>, A Konopka<sup>1</sup>, C J. Thomas<sup>2</sup>, D M. Spencer<sup>3</sup> and J D. Atkin<sup>1,3</sup>

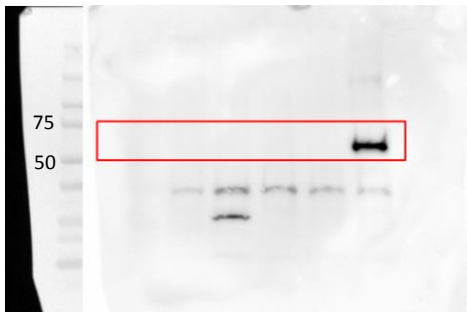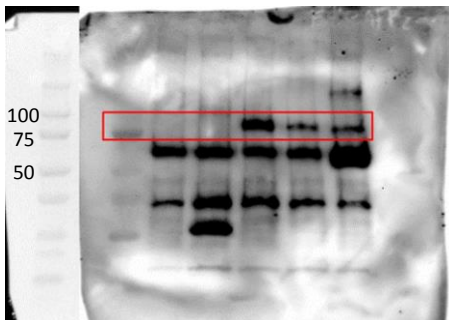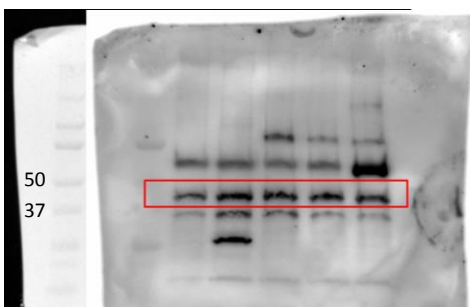

Supplement: 41598_2021_96181_MOESM1_ESM.pdf [file 41598_2021_96181_MOESM1_ESM.pdf]
